# Supplementary material for: Multiplexed automated digital quantification of fusion transcripts: comparative study with fluorescent in-situ hybridization (FISH) technique in acute leukemia patients
Source: Diagn Pathol. 2016 Sep 15;11:89. doi: 10.1186/s13000-016-0541-z (PMC5024455; doi:10.1186/s13000-016-0541-z)
Supplement: Additional file 1: Table S1. — Raw data. (XLS 67 kb) [file 13000_2016_541_MOESM1_ESM.xls]

## Sheet: Raw data
Gene Name	AL samples	Translocations	AML-ETO	BCR-ABL (b2a2)	BCR-ABL (b3a2)	BCR-ABL (e13a3/b2a3)	BCR-ABL (e14a3/b3a3)	BCR-ABL (e19a2)-mm_b	BCR-ABL (e1a2)-mm_b	BCR-ABL(e1a3)-mm_b	CBFb-MYH11 (e5e12)	CBFb-MYH11 (e5e7)	CBFb-MYH11 (e5e8)	E2A (TCF3)	E2A-PBX1 (e13-ins27-e2)	E2A-PBX1 (e13e2)	MLL-AF4 (e10e4)	MLL-AF4 (e10e5)	MLL-AF4 (e8e7)	MLL-AF4 (e9e4)	MLL-AF4 (e9e5)	MLL-AF4_e11e4 (mm-CS3)	MLL-AF4_e11e5 (mm-CS3)	PML-RARA (bcr2)-mm_c	PML-RARA (bcr3)-mm_a	PML-RARA_bcr1 (mm-CS1)	TEL-AML1_e5e2 (mm-CS1)	TEL-AML1_e5e3 (mm-CS2)	GUSB	TBP	NEG_A	NEG_B	NEG_C	NEG_D	NEG_E	NEG_F	NEG_G	NEG_H	POS_A	POS_B	POS_C	POS_D	POS_E	POS_F
20141009_206124330416_Leu-fusion_04.RCC	AML 1	t(15;17)	1.5	1.5	2.24	1.5	1.5	1.5	5.24	8.23	1.5	1.5	1.5	3923.55	1.5	1.5	1.5	1.5	1.5	1	1.5	1.5	1.5	1.5	223.67	1.5	15.71	1.5	1176.69	304.46	1.5	1	1	1	12.5	4.5	1	1	33622.5	11393.5	2957.5	705.5	172.5	77.5
20141009_206124330416_Leu-fusion_05.RCC	AML 2	t(15;17)	6.63	6.63	6.63	6.63	6.63	6.63	6.63	19.88	6.63	6.63	6.63	6288.05	6.63	6.63	6.63	6.63	6.63	13.25	6.63	6.63	6.63	6.63	298.17	6.63	125.89	6.63	795.12	450.57	7	1	1	1	8	8	1	1	33987	11393	2991	744	168	64
20141009_206124330416_Leu-fusion_06.RCC	AML 3	t(15;17)	1.64	1.64	3.49	1.64	1.64	1.64	1.64	6.78	1.64	1.64	1.64	2551.81	1.64	1.64	1.64	1.64	1.64	1.64	1.64	3.49	1.64	1.85	1.64	233.51	16.64	1.64	795.43	450.39	1.12	1.12	1	1	7.12	8.12	1	1	30841.1	10614.1	2959.12	752.12	150.12	65.12
20141120_206196120816_Leu-Fusion_03.RCC	AML 4	t(15;17)	1	1	1	1	1	1	1	5.42	1	1	1	1513.91	1	1	1	1	1	1	1	1	1	1	332.03	1	23.87	1	794.27	451.05	1	1	1	1	8.88	7.88	1	1	36830.9	11967.9	3055.88	805.88	211.88	63.88
20141120_206196120816_Leu-Fusion_04.RCC	AML 5	t(15;17)	1.2	1.2	1.2	1.2	1.2	1.2	1.2	12.55	1.2	1.2	1.2	2942.96	4.18	1.2	1.2	1.2	1.2	1.2	1.2	1.2	1.2	1.2	1.2	239.72	1.79	1.2	753.82	475.25	7.5	1	1	1	7.5	10.5	1	1	39272.5	12749.5	3185.5	788.5	193.5	62.5
20141120_206196120816_Leu-Fusion_05.RCC	AML 6	t(15;17)	1	1	1	1	1	1	1	7.94	1	1	1.11	3149.67	1	1	1	1	1	1	1	1	1	1	486.82	1	20.92	1	520.97	687.66	1.62	1	1	1	5.62	5.62	1	1	31363.6	10380.6	2659.62	658.62	154.62	54.62
20141120_206196120816_Leu-Fusion_06.RCC	AML 7	t(15;17)	190.47	190.47	190.47	190.47	190.47	190.47	190.47	190.47	190.47	190.47	190.47	12928.1	190.47	190.47	190.47	190.47	190.47	190.47	190.47	190.47	190.47	738.07	190.47	190.47	190.47	190.47	1880.89	190.47	5.88	1	1	1	1.88	9.88	1	1	26318.9	9075.88	2383.88	618.88	134.88	33.88
20141120_206196120816_Leu-Fusion_07.RCC	AML 8	t(15;17)	1.36	1.36	6.3	1.36	1.36	1.36	1.36	11.74	1.36	1.36	4.93	1958.29	1.36	1.36	1.36	1.36	1.36	1.36	1.36	1.36	1.36	3.57	2.21	233.62	15.82	1.36	731.83	489.53	1.62	1	1	1	7.62	1	1	1	32167.6	10187.6	2665.62	670.62	148.62	56.62
20141016_206124390416_Leu-Fusion_05.RCC	AML 9	t(8;21)	486.57	1.64	12.91	1.64	1.64	1.64	1.64	16.18	1.64	1.64	1.64	2028.82	1.64	1.64	1.64	1.64	1.64	1.64	4.71	1.64	1.64	1.64	1.64	1.64	11.27	1.64	896.3	399.7	10.88	1	1	1	2.88	2.88	1	1	30750.9	10717.9	2799.88	685.88	156.88	54.88
20141016_206124390416_Leu-Fusion_06.RCC	AML 10	t(8;21)	3768.27	1.14	1.14	1.14	1.14	1.14	1.14	7.14	1.14	1.14	1.14	3966.95	1.14	1.14	1.14	1.14	1.14	1.14	1.14	1.14	1.14	1.43	12.85	1.14	19.7	2.57	606.59	590.6	1	2.25	1	1	6.25	13.25	1	1	31788.2	10992.2	2761.25	696.25	168.25	51.25
20141016_206124390416_Leu-Fusion_07.RCC	AML 11	t(8;21)	1527.8	1.25	6.56	1.25	1.25	1.25	1.25	16.56	1.25	1.25	1.25	1437.8	1.25	1.25	1.25	1	1.25	5.31	1.25	1	1.25	1.25	1.56	1.25	7.81	1.25	932.81	384.06	3.25	1	1	1	7.25	8.25	1	1	30375.2	9801.25	2450.25	632.25	139.25	60.25
20141115_206196140816_Leu-fusion_08.RCC	AML 12	t(8;21)	2325.81	1	1	1.19	1	1	1	4.51	1	1	1	1233	1	1	1	1.61	1	1.19	1	1	1.61	2.02	2.85	1	15.3	1	531.42	674.14	3.88	1	1	1	2.88	5.88	1	1	30367.9	10505.9	2798.88	652.88	163.88	52.88
20141115_206196140816_Leu-fusion_09.RCC	AML 13	t(8;21)	1441.65	1	1	1	1	1	1	6.37	1	1	1	1680.66	1	1	1	1	1	1	1	1	1	1	1	1	4.3	1	901.5	397.39	1	3.38	1	1	10.38	8.38	1	1	36054.4	12435.4	3251.38	868.38	182.38	56.38
20141115_206196140816_Leu-fusion_10.RCC	AML 14	t(8;21)	2201.35	1	2.11	1	1	1	1	8.32	1	1	1	1835.92	1	1	1.22	1	1	1.66	1	1	1	1	3.44	1	11.42	1	865.13	414.1	1	1	1	1	2.75	10.75	1	1	31170.8	10906.8	2652.75	698.75	164.75	53.75
20141120_206196120816_Leu-Fusion_10.RCC	AML 15	t(8;21)	1742.54	1	1	1	1	1	1	1	1	1	1	1788.11	1	1	1	1	1	1	1	1	1	1	1.96	1	1.96	1	920.76	389.08	1	1	1	1	8	6	1	1	25667	8931	2261	644	130	46
20141120_206196120816_Leu-Fusion_11.RCC	AML 16	t(8;21)	1618.28	1.02	1.02	1.02	1.02	1.02	1.02	1.54	1.02	1.02	1.02	576.31	1.02	1.02	1.02	1	1.02	1.02	1.02	1.02	1.02	1.02	2.56	1.02	16.91	1.02	1000.48	358.08	3.5	6.5	1	1	1	1.5	1	1	30910.5	10458.5	2711.5	754.5	134.5	68.5
20141016_206124390416_Leu-Fusion_03.RCC	AML 17	Inv (16)	1.63	1.63	6.11	1.63	1.63	1.63	1.63	12.63	1.63	1.63	1.63	1855.82	1.63	1.63	1.63	1.63	1.63	1.63	1.63	1.63	1.63	1.63	4.48	1.63	30.56	1.63	928.52	385.83	4.75	1	1	1	8.75	4.75	1	1	34167.8	11971.8	3052.75	760.75	168.75	58.75
20141115_206196140816_Leu-fusion_03.RCC	AML 18	Inv (16)	1	1	8.93	1	4.56	1	1	15.26	1	1	32.27	1324.24	1	1	1	1	1	1	1	1	1	3.59	5.53	1	34.22	1	552.56	648.35	14.38	1	1	1	6.38	5.38	1	1	31530.4	11114.4	2934.38	775.38	193.38	60.38
20141115_206196140816_Leu-fusion_04.RCC	AML 19	Inv (16)	1	1	2.07	1	1	1	1	9.72	14.19	1	3.35	1684.89	1	1	1	1	1	1	1	1	1	1	1.43	1	32.68	1	815.11	439.52	9.25	3.25	1	1	2.25	4.25	1	1	34887.2	12162.2	3150.25	856.25	155.25	74.25
20141115_206196140816_Leu-fusion_05.RCC	AML 20	Inv (16)	1.03	1.03	1.03	1.03	1.03	1.03	1.03	5.16	38.19	1.03	1.03	1369.53	1.03	1.03	1.03	1.03	1.03	1.03	1.03	1.03	1.03	1.03	1.03	1.03	21.67	1.03	1119.77	319.93	7	1	1	1	10	6	1	1	33771	11262	2845	728	172	60
20141115_206196140816_Leu-fusion_06.RCC	AML 21	Inv (16)	1	1	4.94	1	1	1	1	12.17	6.87	1	1	1467.36	1	1	1.08	2.53	1	1	1	1	1	1	1.57	1	27.59	1	805.3	444.87	2.25	1.25	1	1	14.25	4.25	1	1	32979.2	11929.2	3075.25	830.25	194.25	47.25
20141120_206196120816_Leu-Fusion_08.RCC	AML 22	Inv (16)	1	1	1	1	1	1	1	9.06	25.26	1	1	2009.17	1	1	1	1	1	1	1	1	1	1	7.15	1.43	23.36	1	786.99	455.22	4.5	1	1	1	10.5	2.5	1	1	29759.5	10094.5	2586.5	692.5	155.5	56.5
20141120_206196120816_Leu-Fusion_09.RCC	AML 23	Inv (16)	1.18	1.18	1	1.18	1.18	1.18	1.18	7.54	1.18	1.18	1	2268.03	1.18	1.18	1.18	1.18	1.18	1.18	1.18	1.18	1.18	1.18	375.61	1.18	7.54	1.18	806.41	444.26	3.38	1	1	1	6.38	6.38	1	1	32495.4	10065.4	2666.38	705.38	179.38	61.38
20141009_206124330416_Leu-fusion_10.RCC	AML 24	Normal karyo	1	1	1	1	1	1	1	6.68	1	1	1	1918.53	1	1	1	1	1	1	1	1	1	1	5.6	1	20.16	1	883.84	405.34	4.38	1	1	1	11.38	11.38	1	1	38027.4	12823.4	3225.38	809.38	181.38	82.38
20141009_206124330416_Leu-fusion_11.RCC	AML 25	Normal karyo	34.23	1	2.16	1	1	1	1	7.91	1	1	1	1689.52	1	1	1	1	1	1	1	1	1	1	2.98	1	20.25	1	634.51	564.61	3.62	1	1	1	9.62	6.62	1	1	34674.6	12792.6	3199.62	827.62	188.62	59.62
20141009_206124330416_Leu-fusion_12.RCC	AML 26	Normal karyo	5.26	5.26	5.26	5.26	5.26	5.26	5.26	5.26	5.26	5.26	5.26	3424.01	5.26	5.26	5.26	5.26	5.26	5.26	5.26	5.26	5.26	5.26	5.26	5.26	5.26	5.26	1352.92	264.8	12.38	1.38	1	1	3.38	3.38	1	1	32084.4	10870.4	2839.38	706.38	149.38	48.38
20141016_206124390416_Leu-Fusion_11.RCC	AML 27	Normal karyo	1.1	1.1	3.71	1.1	1.1	1.1	1.1	3.71	1.1	1.1	1.1	2345.78	1.1	1.1	1.1	1.1	1.1	1.1	1.1	1.1	1.1	1	4.82	1.1	9.22	1.1	591.43	605.74	2.38	1	1	1	5.38	5.38	1	1	27872.4	10021.4	2555.38	654.38	169.38	57.38
20141016_206124390416_Leu-Fusion_12.RCC	AML 28	Normal karyo	1.94	1.94	6.06	4.12	1.94	1.94	1.94	23.53	1.94	1.94	1	2684.36	1.94	1.94	1.94	1.94	1.94	1.94	1.94	1.94	1.94	1.94	6.06	1	27.41	1.94	654.29	547.55	2.12	1	1	1	6.12	5.12	1	1	28145.1	9946.12	2479.12	641.12	158.12	57.12
20150409_206345611216_Leu-fusion_03.RCC	AML 29	Normal karyo	1	1	1.19	1	1	1	1	2.48	1	1	1	1167.87	1	1	1	1	1	1	1	1	1	1	1	1	2.48	1	1249.1	286.81	3.75	1	1	1	2.75	4.75	1	1	26470.8	8630.75	2304.75	635.75	107.75	47.75
20150409_206345611216_Leu-fusion_04.RCC	AML 30	Normal karyo	1.82	1.82	3.87	1.82	1.82	1.82	1.82	9.34	1.82	1.82	1.82	2573.81	1.82	1.82	1.82	1.82	1.82	1.82	1.82	1.82	1.82	1.82	3.87	1	18.45	1.82	548.85	652.74	1.12	1	1	1	4.12	8.12	1	1	22670.1	7460.12	1972.12	501.12	128.12	33.12
20150409_206345611216_Leu-fusion_05.RCC	AML 31	Normal karyo	1.45	1.45	6.91	5.45	1.45	1.45	1.45	5.45	1.45	1.45	1.45	1346.33	1.45	1.45	1.45	1.45	1.45	1.09	1.45	1.45	1.45	1.45	4	1.45	6.91	1.45	1058.38	338.49	1	1	1	1	5.75	7.75	1	1	23720.8	8108.75	2133.75	546.75	114.75	36.75
20150409_206345611216_Leu-fusion_06.RCC	AML 32	Normal karyo	2.62	2.62	1.64	2.62	2.62	2.62	2.62	9.5	2.62	1.64	2.62	1134	2.62	2.62	2.62	2.62	2.62	2.62	2.62	2.62	2.62	2.62	12.12	2.62	6.88	4.26	840.43	426.28	1.62	1	1	1	3.62	1.62	1	1	21026.6	6754.62	1843.62	478.62	91.62	36.62
20150213_206196130816_Leu-fusion_09.RCC	AML 33	Normal karyo	27.79	27.79	27.79	27.79	27.79	27.79	27.79	27.79	27.79	27.79	27.79	1598.16	27.79	27.79	27.79	27.79	27.79	27.79	27.79	27.79	27.79	27.79	27.79	27.79	27.79	27.79	736.54	486.4	1.5	1.5	1	1	1	1	1	1	4020.5	1401.5	386.5	100.5	22.5	5.5
20150213_206196130816_Leu-fusion_10.RCC	AML 34	Normal karyo	17.98	17.98	15.74	17.98	17.98	17.98	17.98	17.98	17.98	17.98	17.98	3990.28	17.98	17.98	17.98	17.98	17.98	15.74	17.98	17.98	17.98	15.74	17.98	17.98	17.98	17.98	555.27	645.19	1	1	1	1	1	1	1	1	5339.88	1818.88	518.88	137.88	17.88	9.88
20150213_206196130816_Leu-fusion_11.RCC	AML 35	Normal karyo	12.54	12.54	12.54	12.54	12.54	12.54	12.54	12.54	12.54	12.54	12.54	2118.43	12.54	12.54	12.54	12.54	12.54	12.54	12.54	12.54	12.54	12.54	25.07	12.54	37.61	12.54	714.5	501.4	1	1	1	1	1	1	1	1	3436	1147	330	85	15	10
20150213_206196130816_Leu-fusion_12.RCC	AML 36	Normal karyo	10.48	10.48	10.48	28.82	10.48	10.48	10.48	10.48	10.48	10.48	10.48	1768.58	10.48	10.48	10.48	10.48	10.48	10.48	10.48	10.48	10.48	10.48	7.86	10.48	7.86	10.48	930.14	385.16	1	1	1	1	1	1	1	1	4836.75	1639.75	465.75	106.75	27.75	10.75
20150213_206196130816_Leu-fusion_04.RCC	AML 37	Normal karyo	14.64	14.64	14.64	14.64	14.64	14.64	14.64	14.64	14.64	14.64	14.64	1799.09	14.64	14.64	14.64	14.64	14.64	14.64	12.81	14.64	14.64	14.64	14.64	14.64	27.45	14.64	422.78	847.38	1	1	1	1	1	1	1	1	2873.88	953.88	273.88	74.88	15.88	1.88
20150220_206196150816_Leu-fusion_06.RCC	AML 38	Normal karyo	1.4	1.4	1.4	4.89	1.4	1.4	1.4	7.68	1.4	1.4	2.09	2150.22	1.4	10.47	1.4	3.49	1.4	1.4	1.4	1.4	1.4	1.4	7.68	3.49	6.28	1.4	547.85	653.93	1.5	1	1	1	1	7.5	1	1	23556.5	8196.5	2252.5	584.5	126.5	48.5
20150220_206196150816_Leu-fusion_07.RCC	AML 39	Normal karyo	1.37	1.37	14.34	7.51	6.15	1.37	1.37	17.07	4.78	1.37	1.37	2533.11	1.37	1.37	1.37	4.78	1.37	3.41	1.37	1	1.37	6.15	7.51	1.37	8.88	1.37	540.22	663.16	5.5	1	1	1	7.5	1.5	1	1	23630.5	7547.5	2109.5	553.5	108.5	52.5
20150409_206345611216_Leu-fusion_07.RCC	AML 40	Normal karyo	6.12	6.12	29.07	6.12	6.12	6.12	6.12	6.12	6.12	6.12	4.59	1344.69	6.12	6.12	6.12	6.12	6.12	6.12	6.12	6.12	6.12	6.12	6.12	6.12	6.12	6.12	1069.33	335.03	1.75	1	1	1	6.75	2.75	1	1	26557.8	8667.75	2296.75	623.75	141.75	44.75
20150409_206345611216_Leu-fusion_08.RCC	AML 41	Normal karyo	1	1	1	1	1	1	1	3.99	1	1	1	956.64	1	1	1	1	1	1	1	1	1	1.25	1	1	5.81	1	983.99	364.08	3.38	1.38	1	1	3.38	4.38	1	1	23093.4	7634.38	1989.38	515.38	127.38	37.38
20150409_206345611216_Leu-fusion_09.RCC	AML 42	Normal karyo	1.6	1.6	2.61	1.6	1.6	1.6	1.6	17.04	1.6	1.6	1.6	1749.36	1.6	1.6	1.6	1.6	1.6	1.6	1.6	1.6	1.6	1.6	1	1.6	18.65	1.6	685.91	522.3	5.62	1	1	1	6.62	1.62	1	1	25174.6	8123.62	2073.62	568.62	132.62	41.62
20150213_206196130816_Leu-fusion_01.RCC	AML 43	Complex Karyo	9.39	9.39	3.52	9.39	3.52	9.39	9.39	50.5	9.39	9.39	9.39	4475.42	9.39	9.39	9.39	9.39	9.39	9.39	9.39	9.39	9.39	12.92	12.92	22.31	144.44	9.39	304.15	1177.86	1	1	1	1	1.38	2.38	1	1	4387.38	1525.38	391.38	100.38	16.38	5.38
20150213_206196130816_Leu-fusion_02.RCC	AML 44	Complex Karyo	9.73	9.73	9.73	9.73	9.73	9.73	9.73	9.73	9.73	9.73	9.73	1079.34	9.73	9.73	9.73	9.73	9.73	9.73	9.73	9.73	9.73	18.25	9.73	9.73	47.46	9.73	504.99	709.42	1	1	1	1	1	1	1	1	4415.88	1506.88	435.88	96.88	14.88	8.88
20150213_206196130816_Leu-fusion_03.RCC	AML 45	Complex Karyo	34.68	34.68	21.67	34.68	34.68	34.68	34.68	34.68	34.68	34.68	34.68	5604.99	34.68	34.68	34.68	34.68	34.68	34.68	56.35	34.68	34.68	34.68	34.68	34.68	34.68	34.68	888.65	403.14	1	1	1	1	1	1.62	1	1	3620.62	1196.62	365.62	81.62	13.62	2.62
20150213_206196130816_Leu-fusion_05.RCC	AML 46	Complex Karyo	8.9	8.9	8.9	8.9	8.9	8.9	8.9	8.9	8.9	8.9	8.9	1172.16	8.9	8.9	8.9	8.9	8.9	8.9	8.9	8.9	8.9	8.9	8.9	8.9	8.9	8.9	673.93	531.58	1.75	1	1	1	1	1	1	1	4945.75	1662.75	487.75	128.75	20.75	15.75
20150213_206196130816_Leu-fusion_06.RCC	AML 47	Complex Karyo	12.41	12.41	12.41	12.41	12.41	12.41	12.41	12.41	12.41	12.41	12.41	4948.24	10.85	12.41	12.41	12.41	12.41	12.41	12.41	12.41	12.41	12.41	12.41	12.41	12.41	12.41	643.53	556.7	1	1	1	1	1	1	1	1	5440.88	1814.88	519.88	132.88	29.88	10.88
20150213_206196130816_Leu-fusion_07.RCC	AML 48	Complex Karyo	4.91	4.91	4.91	4.91	4.91	4.91	3.68	4.91	4.91	4.91	8.58	2735.93	4.91	4.91	4.91	4.91	4.91	4.91	4.91	4.91	4.91	4.91	4.91	4.91	4.91	4.91	562.88	636.46	1	1	1	1	1	1	1	1	5024.75	1718.75	470.75	122.75	28.75	10.75
20150213_206196130816_Leu-fusion_08.RCC	AML 49	Complex Karyo	13.47	13.47	13.47	13.47	13.47	13.47	13.47	13.47	13.47	13.47	13.47	2088.11	13.47	13.47	13.47	13.47	13.47	13.47	13.47	13.47	13.47	13.47	13.47	13.47	26.94	13.47	565.81	633.17	1	1	1	1	1	1	1	1	3808	1242	345	98	20	6
20150220_206196150816_Leu-fusion_01.RCC	AML 50	Complex Karyo	1	1	1	1	1	1	1	7.09	1	1	1	1551.83	1	1	1	1	1	1	1	1	1	1	3.1	1	11.88	1	675.62	530.26	1.88	1	1	1	7.88	1	1	1	22942.9	7308.88	1955.88	535.88	94.88	45.88
20150220_206196150816_Leu-fusion_02.RCC	AML 51	Complex Karyo	1	1	4.01	3.21	1	1	1	1	2.41	1	1	1078.42	1	1	1	2.41	1	1	1	1	1	1	5.61	1	3.21	1	749.68	477.87	3	1	1	1	6	2	1	1	23947	7705	2065	580	101	48
20150220_206196150816_Leu-fusion_03.RCC	AML 52	Complex Karyo	4.32	2.16	8.63	2.16	2.16	2.16	2.16	6.48	2.16	2.16	6.48	2186.69	2.16	2.16	2.16	8.63	2.16	2.16	2.16	2.16	2.16	6.48	2.16	2.16	12.95	2.16	964.9	371.28	3	1	1	1	3	8	1	1	29399	9194	2425	622	152	61
20150220_206196150816_Leu-fusion_05.RCC	AML 53	Complex Karyo	9.88	2.08	7.8	2.08	2.08	2.08	2.08	11.96	2.08	2.08	2.08	1368.01	2.08	2.08	2.08	3.64	2.08	2.08	2.08	2.08	2.08	2.08	2.08	7.8	5.72	1.56	958.28	373.85	7.75	1.75	1	1	1	1	1	1	25391.8	8211.75	2153.75	592.75	119.75	44.75
20150430_206345621216_Leu-fusion_02.RCC	AML 54	Complex Karyo	1	1	1	1	1	1	1	2.83	1	1	1.27	1049.86	1	1	1	1.27	1	1	1	1	1	1	1	1	4.39	1	892.26	401.51	1	1.62	1	1.62	1.62	6.62	1	1	17482.6	6580.62	1778.62	502.62	87.62	31.62
20150430_206345621216_Leu-fusion_03.RCC	AML 55	Complex Karyo	1	1	2.88	1	1	1	1	4.83	1	1.26	1.91	902.55	1	1	1	1.26	1	1.26	1	1	1	2.88	2.56	1	12.62	1.91	752.23	476.26	1	1	1	2.88	2.88	2.88	1	1	19143.9	7115.88	1831.88	494.88	98.88	34.88
20150430_206345621216_Leu-fusion_04.RCC	AML 56	Complex Karyo	1.01	1.01	6.41	1.01	1.01	1.01	4.4	6.41	1.01	1.01	1.01	2595.04	1.01	1.01	1.38	1.01	1.01	1.38	1.01	1.01	1.01	1.01	461.16	1.01	33.58	1.01	546.68	655.33	1	3.38	1	1	2.38	7.38	1	1	16477.4	5849.38	1551.38	397.38	82.38	23.38
20150430_206345621216_Leu-fusion_05.RCC	AML 57	Complex Karyo	1	1	1.87	1	1	1	1	1.87	1	1	1	2181.18	1	1	1	1	1	1	1	1	1	1	1	1	1	1	495.93	722.38	1	1	1	1	3	6	1	1	16301	5383	1476	432	77	28
20150430_206345621216_Leu-fusion_06.RCC	AML 58	Complex Karyo	1.08	1.08	1.08	1.08	1.21	1.08	1.08	15.24	1.08	1.08	1.08	2445.99	1.08	1.08	1.08	2.29	1.08	1.08	1	1.08	1.08	1	1.08	1.08	10.92	1.08	500.74	715.44	6.12	1	1	1	4.12	1	1	1	13050.1	4501.12	1137.12	343.12	55.12	25.12
20150430_206345621216_Leu-fusion_07.RCC	AML 59	Complex Karyo	1.06	1.06	1.32	1.06	1.06	1.06	1.06	5.56	1.06	1	4.5	1100.54	1.06	3.44	1	1.06	1.06	1.06	1.06	1	1.06	1.06	1.32	1.06	18.27	1.32	836.86	428.09	1.25	1.25	1	1.25	1	4.25	1	1	19275.2	7050.25	1837.25	522.25	94.25	37.25
20150430_206345621216_Leu-fusion_08.RCC	AML 60	Complex Karyo	1.26	1.26	5.66	1.26	1.26	1.26	1.26	8.18	1.26	1.26	1.26	2008.83	1.26	1.26	1.26	4.4	1.26	1	1.26	1.26	1.26	1.89	1.26	1.89	19.5	1.26	427.18	838.64	5.5	1.5	1	1	1.5	1	1	1	17666.5	6420.5	1731.5	433.5	112.5	41.5
20150430_206345621216_Leu-fusion_09.RCC	AML 61	Complex Karyo	1.49	1.49	1.49	1.49	1.49	1.49	1.49	2.98	1.49	1.49	1.49	1498.61	1.49	1.49	1.49	1.49	1.49	1.49	1.49	1.49	1.49	1.49	1.49	4.46	1.49	1.49	714.33	501.52	2	2	1	1	5	1	1	1	19069	6863	1747	470	95	23
20150430_206345621216_Leu-fusion_10.RCC	AML 62	Complex Karyo	4.37	4.37	4.37	4.37	4.37	4.37	4.37	4.37	4.37	4.37	4.37	959.76	4.37	4.37	4.37	4.37	4.37	4.37	4.37	4.37	4.37	4.37	4.37	4.37	4.37	4.37	632.19	566.68	2.75	1	1	1	1	4.75	1	1	18069.8	5793.75	1486.75	410.75	77.75	28.75
20150430_206345621216_Leu-fusion_11.RCC	AML 63	Complex Karyo	1.36	1.36	1.36	1.36	1.36	1.36	1.36	4.93	1.36	1.36	1.36	1832.69	1.36	1.36	1.36	1.36	1.36	1.36	1.36	1.36	1.36	1.36	3.57	2.21	19.9	1.36	562.92	636.41	1	1	1	1	5.62	4.62	1	1	19958.6	7145.62	1757.62	498.62	102.62	44.62
20141009_206124330416_Leu-fusion_01.RCC	ALL 1	t(9;22)	1	4248.56	22.56	6.91	1.7	3.78	1	43.42	1.04	1.04	2.74	14711.8	1.04	5.87	1.04	5.87	1.04	1.04	4.82	1.7	1.04	5.87	2.74	9	26.73	1.04	385.59	929.1	5.62	1	1	1	1.62	3.62	1	1	22749.6	7611.62	2056.62	509.62	126.62	35.62
20141009_206124330416_Leu-fusion_02.RCC	ALL 2	t(9;22)	1	1	7.36	1	1	1	2052.57	22.09	1	4.09	4.91	3329.6	1	1	1	2.45	1	1	1	1	1	4.09	1	4.09	13.91	1	570.2	628.29	1	1	1	1	7	5	1	1	28867	10265	2635	687	164	57
20141009_206124330416_Leu-fusion_03.RCC	ALL 3	t(9;22)	2.98	1	4.86	1	1	1	2390.41	41.82	1	1	1	6389.1	1	1	1	4.23	1	1	1	1	1	1	7.36	4.23	23.65	1.72	503.52	711.5	6.75	1	1	1	9.75	7.75	1	1	34795.8	12560.8	3164.75	843.75	202.75	53.75
20141016_206124390416_Leu-Fusion_08.RCC	ALL 4	t(9;22)	1	1	1.62	1	1	1	1071.34	5.62	1	1	1	3940.57	1	1	1	1	1	1	1	1	1	1	2.62	8.62	1	1	621.46	576.47	1	1	1	1	8.62	7.62	1	1	29132.6	9303.62	2537.62	649.62	155.62	50.62
20141016_206124390416_Leu-Fusion_09.RCC	ALL 5	t(9;22)	4.12	1	2.32	2.32	2.32	1	2254.98	34.69	1.72	1	1	2266.97	1	2.92	1	7.72	1	1.12	1	1.12	1	4.12	1	18.51	10.12	1	522.03	686.27	1.88	1	1	1	3.88	7.88	1	1	30907.9	11055.9	2767.88	683.88	165.88	62.88
20141016_206124390416_Leu-Fusion_10.RCC	ALL 6	t(9;22)	1.01	1.01	6.09	1.01	2.03	1.01	3041.7	23.34	1.01	5.07	2.03	11231.1	1.01	1.01	1.01	2.03	1.01	1.01	1.01	1.01	1.01	5.07	3.04	11.16	28.42	1.01	381.61	938.8	1	1	1	1	5	7	1	1	24392	8562	2292	636	147	47
20141120_206196120816_Leu-Fusion_02.RCC	ALL 7	t(9;22)	1	1.81	1	1.81	1	1	1	2639.35	1	1	1	6426.21	1	1	1	1.81	1	1.81	1	1	1	1	2.65	9.45	10.3	1	514.87	695.81	6.12	1	1	1	1.12	8.12	1	1	29256.1	9375.12	2391.12	659.12	132.12	48.12
20141009_206124330416_Leu-fusion_07.RCC	ALL 8	t(4;11)	3.77	1	4.6	3.77	4.81	1	1	17	2.53	1	1	4004.52	1	1.91	11.22	2.74	1	1.29	1.91	245.87	1	2.33	2.74	8.11	12.04	1	571.08	627.32	5.25	2.25	1	1	2.25	2.25	1	1	29828.2	9808.25	2557.25	691.25	158.25	63.25
20141009_206124330416_Leu-fusion_08.RCC	ALL 9	t(4;11)	1	1	1.38	1	1	1	1	17.99	1	1	3.23	3222.28	1	1	281.86	1	1	1.38	1	1	1	1	3.23	5.07	22.6	1	507.91	705.35	4.5	1	1	1	5.5	10.5	1	1	32320.5	11067.5	2819.5	665.5	162.5	62.5
20141009_206124330416_Leu-fusion_09.RCC	ALL 10	t(4;11)	1	1	5.12	1	1	1	1	16.97	1	1	1	3575.74	1	1	88.61	1	1	1	1	1	1	1.35	4.58	1	42.82	1	764.06	468.88	11.5	1	1	1	5.5	5.5	1	1	35360.5	12237.5	3228.5	859.5	181.5	76.5
20141115_206196140816_Leu-fusion_11.RCC	ALL 11	t(4;11)	1	1	7.61	4.17	7.61	1	1	17.92	1	1	1.76	2138.57	1	1	1	2.79	1	551.87	1.07	1	1	2.11	7.26	11.39	5.54	1	532.96	672.2	1.12	4.12	1	1	3.12	13.12	1	1	28937.1	10173.1	2574.12	715.12	182.12	51.12
20141115_206196140816_Leu-fusion_12.RCC	ALL 12	t(4;11)	1	1	8.01	3.19	1	1	1	19.09	1	1	1	3992.27	1	1	1	2.23	1	1	1	1	1	2.23	7.05	7.05	8.49	1	610.71	586.62	1.62	1	1	1	13.62	3.62	1	1	32826.6	10787.6	2748.62	678.62	175.62	58.62
20141120_206196120816_Leu-Fusion_12.RCC	ALL 13	t(4;11)	4.09	1	6.42	2.34	4.09	1	1	32.69	1	1.75	1	7894.91	1	1	1	2.92	1	1	447.78	1	1	1	4.67	10.51	35.03	1	517.84	691.82	10	1	1	1	2	5	1	1	29837	10080	2544	665	155	45
20150409_206345611216_Leu-fusion_12.RCC	ALL 14	t(4;11)	4.93	1	1	1.77	3.35	1	1	2.17	4.93	1	1	3803.14	2.17	2.56	8.87	5.32	1	3.35	1.77	678.49	1	1	3.74	12.42	2.56	1	628.83	569.71	2.5	4.5	1	1	4.5	1	1	1	19207.5	7143.5	1934.5	476.5	82.5	38.5
20141016_206124390416_Leu-Fusion_01.RCC	ALL 15	t(12;21)	1	1	4.29	3.65	3.02	1	1	8.73	1.11	1	2.38	6519.13	1	1	1	1	1	1	1	1	1	1	6.19	4.29	20.8	10	530.78	674.95	2.75	1.75	1	1	9.75	1.75	1	1	26353.8	8756.75	2286.75	575.75	108.75	53.75
20141016_206124390416_Leu-Fusion_02.RCC	ALL 16	t(12;21)	1.06	1	3.02	1	3.67	1	1	21.95	1	1.71	1	8778.9	1	1	1	1	1.71	1.71	1	1	1	3.67	6.28	6.94	28.48	3.02	432.58	828.19	5.62	1	1	1	6.62	8.62	1	1	25139.6	8743.62	2268.62	548.62	130.62	54.62
20141115_206196140816_Leu-fusion_01.RCC	ALL 17	t(12;21)	1	1	2.17	6.02	1	1	1	16.62	1	1	1	7672.62	1	1.2	1	1.2	1	2.17	1.2	1	1.2	1	7.95	9.88	42.64	21.44	447.31	800.91	2.25	1.25	1	1	3.25	4.25	1	1	19791.2	6740.25	1672.25	409.25	118.25	43.25
20141115_206196140816_Leu-fusion_02.RCC	ALL 18	t(12;21)	1	1	6.66	2.86	5.2	1	1	9.88	1.39	1	3.15	6146.99	1	2.56	1	2.86	1	1.39	1.1	1.1	1	5.78	4.9	7.83	13.69	8.71	504.76	709.74	5.75	2.75	1	1	3.75	1.75	1	1	31274.8	9766.75	2552.75	648.75	161.75	63.75
20141120_206196120816_Leu-Fusion_01.RCC	ALL 19	t(12;21)	6.93	3.69	3.69	3.69	3.69	3.69	3.69	3.23	3.69	3.69	3.69	3893.52	3.69	3.23	3.69	3.69	3.69	3.69	3.69	3.69	3.69	6.93	3.23	3.69	40.18	3.69	468.74	764.29	4.88	1	1	1	1	1	1	1	9172.88	3174.88	812.88	198.88	42.88	17.88
20150409_206345611216_Leu-fusion_01.RCC	ALL 20	t(12;21)	1	1	2.58	2.03	1	1	1	6.99	1.48	1	1	5631.64	1	1	1	3.13	1	1	1	1	1	2.58	1.21	2.58	12.5	6.44	561.22	638.35	5.38	1	1	1	6.38	1.38	1	1	24283.4	8251.38	2314.38	555.38	123.38	46.38
20150409_206345611216_Leu-fusion_02.RCC	ALL 21	t(12;21)	2.01	2.01	2.01	2.01	2.01	2.01	2.01	24.92	2.01	2.01	2.01	9737.77	2.01	2.01	2.01	2.01	2.01	2.01	2.01	2.01	2.01	2.01	4.78	2.01	43.04	2.77	455.79	786	1.38	1	1	1	1.38	3.38	1	1	23620.4	8294.38	2223.38	601.38	111.38	40.38
20150409_206345611216_Leu-fusion_10.RCC	ALL 22	t(12;21)	1.34	1.34	1.34	3.01	1.34	1.34	1.34	5.69	1.34	1.34	1.34	6253.89	1.34	1.34	1.34	1	1.34	1	1.34	1.34	1.34	1.34	1.34	1.67	212.05	114.23	474.68	754.73	1	1	1	1	6.25	11.25	1	1	21580.2	7310.25	2085.25	553.25	95.25	61.25
20141115_206196140816_Leu-fusion_07.RCC	ALL 23	t(1;19)	1	1	1.6	1	1	1	2.52	4.36	1	1	1	1404.75	1	1	1	1	1	1	1	1	1	1	1	1	19.95	1	878.34	407.87	3.75	1	1	1	7.75	7.75	1	1	31717.8	10549.8	2655.75	749.75	164.75	54.75
20150409_206345611216_Leu-fusion_11.RCC	ALL 24	t(1;19)	1	1	3.13	1	1	1	1	8.13	1	1.88	1	5101.34	1	1265.64	1	1	1	1	1	1	1.88	3.13	1.25	1	5.63	1	353.48	1013.51	3	1	1	1	2	5	1	1	17754	6532	1763	458	81	30
20150430_206345621216_Leu-fusion_01.RCC	ALL 25	t(1;19)	1.34	1.34	1.34	1.34	1.34	1.34	1.34	28.19	1.34	1.34	1.34	5933.79	1.34	2133.21	1.34	1.34	1.34	1.34	1.34	1.34	1.34	1.34	1.34	1.34	25.51	1.34	522.23	686.01	3	1	1	1	2	4	1	1	17502	6481	1701	443	87	32
20150430_206345621216_Leu-fusion_12.RCC	ALL 26	t(1;19)	1.19	1.19	4.18	1.19	1.19	1.19	1.19	31.61	1.19	1	1.19	11510.5	1.19	3092.49	1.19	1.19	1.19	1	1.19	1.19	1.19	1.19	1	1	13.72	1.19	379.93	942.96	2.5	1	1	1	5.5	3.5	1	1	20587.5	6578.5	1741.5	463.5	93.5	32.5
20150220_206196150816_Leu-fusion_08.RCC	NBM 1	Normal BM	1.46	1.46	1.46	1.46	1.46	1.46	1.46	11.3	1.46	1.46	1.46	3760.49	1.46	1.46	1.46	1.46	1.46	1.46	1.46	1.46	1.46	1.46	1.46	1.46	1.46	1.46	995.63	359.83	1	2.75	1	1	2.75	1.75	1	1	22810.8	7781.75	2040.75	528.75	108.75	41.75
20150220_206196150816_Leu-fusion_09.RCC	NBM 2	Normal BM	2.4	2.4	2.4	2.4	2.4	2.4	2.4	1.5	2.4	2.4	2.4	3282.52	2.4	2.4	2.4	2.4	2.4	2.4	2.4	2.4	2.4	2.4	2.4	6.3	2.4	2.4	1040.01	344.47	9.62	1	1	1	7.62	6.62	1	1	26692.6	8728.62	2289.62	592.62	111.62	53.62
20150220_206196150816_Leu-fusion_10.RCC	NBM 3	Normal BM	1.26	1.26	1	1.26	1.26	1.26	1.26	1	2.99	1.26	1.26	1872.53	1.73	1.26	1.26	1	1.26	1.26	1.26	1	1.26	1.26	1.73	2.99	1.73	1.26	668.97	535.53	2.38	1	1	1	2.38	1	1	1	24741.4	8511.38	2164.38	588.38	128.38	37.38
20150220_206196150816_Leu-fusion_11.RCC	NBM 4	Normal BM	5.16	5.16	5.16	6.45	5.16	5.16	5.16	1.29	5.16	5.16	5.16	3513.57	5.16	5.16	5.16	5.16	5.16	5.16	5.16	5.16	5.16	5.16	5.16	5.16	5.16	5.16	1213.31	295.27	6.25	2.25	1	1	1.25	1.25	1	1	23905.2	7892.25	2065.25	561.25	118.25	38.25
20150220_206196150816_Leu-fusion_12.RCC	NBM 5	Normal BM	1.28	1.28	4.47	1.28	1.28	1.28	1.28	1.28	1.28	1.28	1.28	2440.89	1.28	1.28	1.28	1.28	1.28	1.28	1.28	1.28	1.28	1.28	1.92	1.28	5.75	1.28	593.45	603.67	1.5	1	1	1	3.5	5.5	1	1	23035.5	7951.5	2094.5	587.5	116.5	55.5
